# Supplementary material for: Prevalence and associated factors of frailty among community dwelling older adults in Northwest China: a cross-sectional study
Source: HighWire-hosted journal article supplement (doi:10.1136/bmjopen-2021-060089), 2022-08-01
Supplement: bmjopen-2021-060089supp001_data_supplement.pdf [file bmjopen-2021-060089supp001_data_supplement.pdf]

Supplementary Table 1. Univariate and multivariate multinomial logistic regression analysis of risk factors for higher level of frailty among community dwelling older adults (N=2647)

| Level of frailty based on CFAI    | Variables                             | Univariate analysis |               | Multivariate analysis |              |
|-----------------------------------|---------------------------------------|---------------------|---------------|-----------------------|--------------|
|                                   |                                       | OR                  | 95% CI        | OR                    | 95% CI       |
| Mild frailty <sup>#</sup>         | <b>Age (years)</b>                    | 1.06*               | (1.04, 1.07)  | 1.06*                 | (1.04, 1.08) |
|                                   | <b>Gender</b>                         |                     |               |                       |              |
|                                   | Male                                  | 1                   | reference     | 1                     | reference    |
|                                   | Female                                | 1.37*               | (1.15, 1.63)  | 1.34*                 | (1.11, 1.62) |
|                                   | <b>Marital status</b>                 |                     |               |                       |              |
|                                   | Married                               | 1                   | reference     | -                     | -            |
|                                   | Unmarried/Divorced/Widowed            | 1.08                | (0.83, 1.41)  | -                     | -            |
|                                   | <b>Educational level</b>              |                     |               |                       |              |
|                                   | College or above                      | 1                   | reference     | -                     | -            |
|                                   | High school                           | 1.10                | (0.81, 1.51)  | -                     | -            |
|                                   | Middle school                         | 1.22                | (0.90, 1.65)  | -                     | -            |
|                                   | Primary school or below               | 1.41*               | (1.01, 1.96)  | -                     | -            |
|                                   | <b>Working type before retirement</b> |                     |               |                       |              |
|                                   | Intelligently                         | 1                   | reference     | -                     | -            |
|                                   | Physically                            | 1.01                | (0.81, 1.26)  | -                     | -            |
|                                   | Both                                  | 1.07                | (0.83, 1.37)  | -                     | -            |
|                                   | <b>Empty nesters</b>                  |                     |               |                       |              |
|                                   | No                                    | 1                   | reference     | -                     | -            |
|                                   | Yes                                   | 1.06                | (0.86, 1.31)  | -                     | -            |
|                                   | <b>Medical insurance</b>              |                     |               |                       |              |
|                                   | Self-paying                           | 1                   | reference     | -                     | -            |
|                                   | Urban residents medical insurance     | 0.82                | (0.48, 1.40)  | -                     | -            |
|                                   | Employee medical insurance            | 0.62                | (0.37, 1.06)  | -                     | -            |
|                                   | Commercial medical insurance          | 3.96                | (0.85, 18.46) | -                     | -            |
|                                   | Other medical insurance               | 0.64                | (0.35, 1.18)  | -                     | -            |
|                                   | <b>Self-perceived medical burden</b>  |                     |               |                       |              |
|                                   | None                                  | 1                   | reference     | 1                     | reference    |
|                                   | Somewhat burdensome                   | 1.61*               | (1.35, 1.92)  | 1.59*                 | (1.31, 1.93) |
|                                   | Highly burdensome                     | 1.59*               | (1.00, 2.54)  | -                     | -            |
|                                   | <b>BMI</b>                            |                     |               |                       |              |
|                                   | Normal body weight                    | 1                   | reference     | 1                     | reference    |
|                                   | Underweight                           | 1.49                | (0.87, 2.56)  | -                     | -            |
| Overweight                        | 1.14                                  | (0.95, 1.38)        | 1.31*         | (1.04, 1.64)          |              |
| Obese                             | 1.09                                  | (0.80, 1.49)        | -             | -                     |              |
| <b>Physical exercise</b>          |                                       |                     |               |                       |              |
| Never                             | 1                                     | reference           | 1             | reference             |              |
| 1-2 times/month                   | 1.07                                  | (0.71, 1.59)        | -             | -                     |              |
| 3-4 times/month                   | 1.44                                  | (0.93, 2.24)        | -             | -                     |              |
| >4 times/month                    | 0.64*                                 | (0.46, 0.89)        | 0.60*         | (0.43, 0.84)          |              |
| <b>Types of medication taking</b> |                                       |                     |               |                       |              |
| 0                                 | 1                                     | reference           | 1             | reference             |              |
| 1                                 | 1.50*                                 | (1.21, 1.87)        | 1.41*         | (1.11, 1.81)          |              |
| 2                                 | 1.57*                                 | (1.22, 2.01)        | 1.35*         | (1.01, 1.80)          |              |
| 3                                 | 1.97*                                 | (1.39, 2.81)        | 1.63*         | (1.10, 2.41)          |              |

|                                 |                                                       |       |              |       |              |
|---------------------------------|-------------------------------------------------------|-------|--------------|-------|--------------|
|                                 | 4                                                     | 1.51  | (0.82, 2.77) | -     | -            |
|                                 | ≥5                                                    | 1.30  | (0.85, 2.01) | -     | -            |
|                                 | <b>Comorbid chronic diseases</b>                      |       |              |       |              |
|                                 | No                                                    | 1     | reference    | -     | -            |
|                                 | Yes                                                   | 0.98  | (0.74, 1.31) | -     | -            |
|                                 | <b>Hypertension</b>                                   |       |              |       |              |
|                                 | No                                                    | 1     | reference    | -     | -            |
|                                 | Yes                                                   | 1.15  | (0.97, 1.37) | -     | -            |
|                                 | <b>Diabetes</b>                                       |       |              |       |              |
|                                 | No                                                    | 1     | reference    | -     | -            |
|                                 | Yes                                                   | 1.12  | (0.89, 1.40) | -     | -            |
|                                 | <b>Coronary heart disease</b>                         |       |              |       |              |
|                                 | No                                                    | 1     | reference    | -     | -            |
|                                 | Yes                                                   | 1.52* | (1.14, 2.04) | -     | -            |
|                                 | <b>Number of comorbid chronic diseases</b>            | 1.06  | (0.95, 1.19) | -     | -            |
|                                 | <b>Number of clinic visit during the past year</b>    | 1.13* | (1.05, 1.21) | 1.12* | (1.03, 1.21) |
|                                 | <b>Number of hospitalization during the past year</b> |       |              |       |              |
|                                 | 0                                                     | 1     | reference    | 1     | reference    |
|                                 | 1                                                     | 1.35* | (1.07, 1.71) | -     | -            |
|                                 | 2                                                     | 2.09* | (1.21, 3.60) | 2.18* | (1.19, 4.00) |
|                                 | ≥3                                                    | 2.13  | (0.92, 4.93) | -     | -            |
|                                 | <b>Medical cost during the past year</b>              |       |              |       |              |
|                                 | ≤5000 CNY                                             | 1     | reference    | -     | -            |
|                                 | 5001-8000 CNY                                         | 1.06  | (0.78, 1.42) | -     | -            |
|                                 | 8001-10000 CNY                                        | 1.40  | (0.77, 2.56) | -     | -            |
|                                 | >10000 CNY                                            | 1.29  | (0.81, 2.05) | -     | -            |
|                                 | <b>Nutritional status based on MNA-SF</b>             |       |              |       |              |
|                                 | Normal (12-14)                                        | 1     | reference    | 1     | reference    |
|                                 | Possible undernutrition (≤11)                         | 1.19* | (1.00, 1.42) | 1.35* | (1.08, 1.68) |
|                                 | <b>Sleep quality based on PSQI</b>                    |       |              |       |              |
|                                 | Good (≤7)                                             | 1     | reference    | 1     | reference    |
|                                 | Poor (>7)                                             | 1.74* | (1.36, 2.22) | 1.57* | (1.22, 2.03) |
| <b>High frailty<sup>#</sup></b> | <b>Age (years)</b>                                    | 1.09* | (1.07, 1.12) | 1.09* | (1.06, 1.13) |
|                                 | <b>Gender</b>                                         |       |              |       |              |
|                                 | Male                                                  | 1     | reference    | 1     | reference    |
|                                 | Female                                                | 1.37* | (1.07, 1.76) | 1.35* | (1.02, 1.78) |
|                                 | <b>Marital status</b>                                 |       |              |       |              |
|                                 | Married                                               | 1     | reference    | -     | -            |
|                                 | Unmarried/Divorced/Widowed                            | 1.67* | (1.19, 2.34) | -     | -            |
|                                 | <b>Educational level</b>                              |       |              |       |              |
|                                 | College or above                                      | 1     | reference    | -     | -            |
|                                 | High school                                           | 1.73* | (1.04, 2.87) | -     | -            |
|                                 | Middle school                                         | 1.63  | (0.98, 2.71) | -     | -            |
|                                 | Primary school or below                               | 2.91* | (1.74, 4.89) | -     | -            |
|                                 | <b>Working type before retirement</b>                 |       |              |       |              |
|                                 | Intelligently                                         | 1     | reference    | -     | -            |
|                                 | Physically                                            | 1.18  | (0.85, 1.63) | -     | -            |
|                                 | Both                                                  | 1.41  | (0.99, 2.01) | -     | -            |
|                                 | <b>Empty nesters</b>                                  |       |              |       |              |

|                                                       |                                                    |       |               |       |               |
|-------------------------------------------------------|----------------------------------------------------|-------|---------------|-------|---------------|
|                                                       | No                                                 | 1     | reference     | -     | -             |
|                                                       | Yes                                                | 1.35* | (1.02, 1.80)  | -     | -             |
| <b>Medical insurance</b>                              |                                                    |       |               |       |               |
|                                                       | Self-paying                                        | 1     | reference     | -     | -             |
|                                                       | Urban residents medical insurance                  | 1.61  | (0.70, 3.74)  | -     | -             |
|                                                       | Employee medical insurance                         | 1.05  | (0.45, 2.43)  | -     | -             |
|                                                       | Commercial medical insurance                       | 3.75  | (0.52, 26.84) | -     | -             |
|                                                       | Other medical insurance                            | 0.89  | (0.34, 2.35)  | -     | -             |
| <b>Self-perceived medical burden</b>                  |                                                    |       |               |       |               |
|                                                       | None                                               | 1     | reference     | 1     | reference     |
|                                                       | Somewhat burdensome                                | 4.31* | (3.21, 5.78)  | 4.24* | (3.08, 5.84)  |
|                                                       | Highly burdensome                                  | 8.07* | (4.67, 13.95) | 7.45* | (4.07, 13.61) |
| <b>BMI</b>                                            |                                                    |       |               |       |               |
|                                                       | Normal body weight                                 | 1     | reference     | 1     | reference     |
|                                                       | Underweight                                        | 2.82* | (1.51, 5.24)  | 2.16* | (1.09, 4.27)  |
|                                                       | Overweight                                         | 1.12  | (0.86, 1.46)  | 1.53* | (1.10, 2.12)  |
|                                                       | Obese                                              | 0.80  | (0.50, 1.29)  | -     | -             |
| <b>Physical exercise</b>                              |                                                    |       |               |       |               |
|                                                       | Never                                              | 1     | reference     | 1     | reference     |
|                                                       | 1-2 times/month                                    | 0.71  | (0.45, 1.14)  | -     | -             |
|                                                       | 3-4 times/month                                    | 0.54* | (0.31, 0.94)  | 0.53* | (0.29, 0.97)  |
|                                                       | >4 times/month                                     | 0.28* | (0.19, 0.41)  | 0.26* | (0.17, 0.40)  |
| <b>Types of medication taking</b>                     |                                                    |       |               |       |               |
|                                                       | 0                                                  | 1     | reference     | 1     | reference     |
|                                                       | 1                                                  | 1.92* | (1.39, 2.66)  | 1.78* | (1.23, 2.58)  |
|                                                       | 2                                                  | 2.33* | (1.63, 3.33)  | 1.88* | (1.24, 2.85)  |
|                                                       | 3                                                  | 4.52* | (2.91, 7.00)  | 3.41* | (2.05, 5.67)  |
|                                                       | 4                                                  | 2.95* | (1.37, 6.34)  | -     | -             |
|                                                       | ≥5                                                 | 3.11* | (1.82, 5.32)  | -     | -             |
| <b>Comorbid chronic diseases</b>                      |                                                    |       |               |       |               |
|                                                       | No                                                 | 1     | reference     | -     | -             |
|                                                       | Yes                                                | 1.20  | (0.82, 1.76)  | -     | -             |
| <b>Hypertension</b>                                   |                                                    |       |               |       |               |
|                                                       | No                                                 | 1     | reference     | -     | -             |
|                                                       | Yes                                                | 1.40  | (1.09, 1.78)  | -     | -             |
| <b>Diabetes</b>                                       |                                                    |       |               |       |               |
|                                                       | No                                                 | 1     | reference     | -     | -             |
|                                                       | Yes                                                | 1.06  | (0.77, 1.46)  | -     | -             |
| <b>Coronary heart disease</b>                         |                                                    |       |               |       |               |
|                                                       | No                                                 | 1     | reference     | -     | -             |
|                                                       | Yes                                                | 1.47  | (0.99, 2.17)  | -     | -             |
|                                                       | Number of comorbid chronic diseases                | 1.22* | (1.05, 1.42)  | -     | -             |
|                                                       | <b>Number of clinic visit during the past year</b> | 1.28* | (1.17, 1.39)  | 1.27* | (1.15, 1.40)  |
| <b>Number of hospitalization during the past year</b> |                                                    |       |               |       |               |
|                                                       | 0                                                  | 1     | reference     | -     | -             |
|                                                       | 1                                                  | 1.67* | (1.22, 2.28)  | -     | -             |
|                                                       | 2                                                  | 2.89* | (1.50, 5.57)  | -     | -             |
|                                                       | ≥3                                                 | 4.35* | (1.72, 11.02) | -     | -             |
| <b>Medical cost during the past year</b>              |                                                    |       |               |       |               |
|                                                       | ≤5000 CNY                                          | 1     | reference     | -     | -             |

|                                           |       |              |       |              |
|-------------------------------------------|-------|--------------|-------|--------------|
| 5001-8000 CNY                             | 1.21  | (0.80, 1.82) | -     | -            |
| 8001-10000 CNY                            | 2.03  | (0.97, 4.26) | -     | -            |
| >10000 CNY                                | 2.51* | (1.46, 4.32) | -     | -            |
| <b>Nutritional status based on MNA-SF</b> |       |              |       |              |
| Normal (12-14)                            | 1     | reference    | 1     | reference    |
| At risk for undernutrition ( $\leq 11$ )  | 1.69* | (1.32, 2.16) | 2.06* | (1.50, 2.82) |
| <b>Sleep quality based on PSQI</b>        |       |              |       |              |
| Good ( $\leq 7$ )                         | 1     | reference    | 1     | reference    |
| Poor ( $> 7$ )                            | 3.05* | (2.26, 4.11) | 2.28* | (1.64, 3.17) |

Note: #: The reference is no-low frailty; \*:  $P < 0.05$ ; CFAI: the Comprehensive Frailty Assessment Instrument; BMI: Body Mass Index; CNY: Chinese Yuan; MNA-SF: the Short-Form Mini-Nutritional Assessment; PSQI: the Pittsburgh Sleep Quality Index.
